# Supplementary material for: Spatial uniformity of action potentials indicates base-to-apex depolarization and repolarization of rainbow trout (Oncorhynchus mykiss) ventricle
Source: Oxford University Press journal article supplement (doi:10.1242/jeb.244466), 2022-08-11
Supplement: jeb244466supp.pdf [file jeb244466supp.pdf]

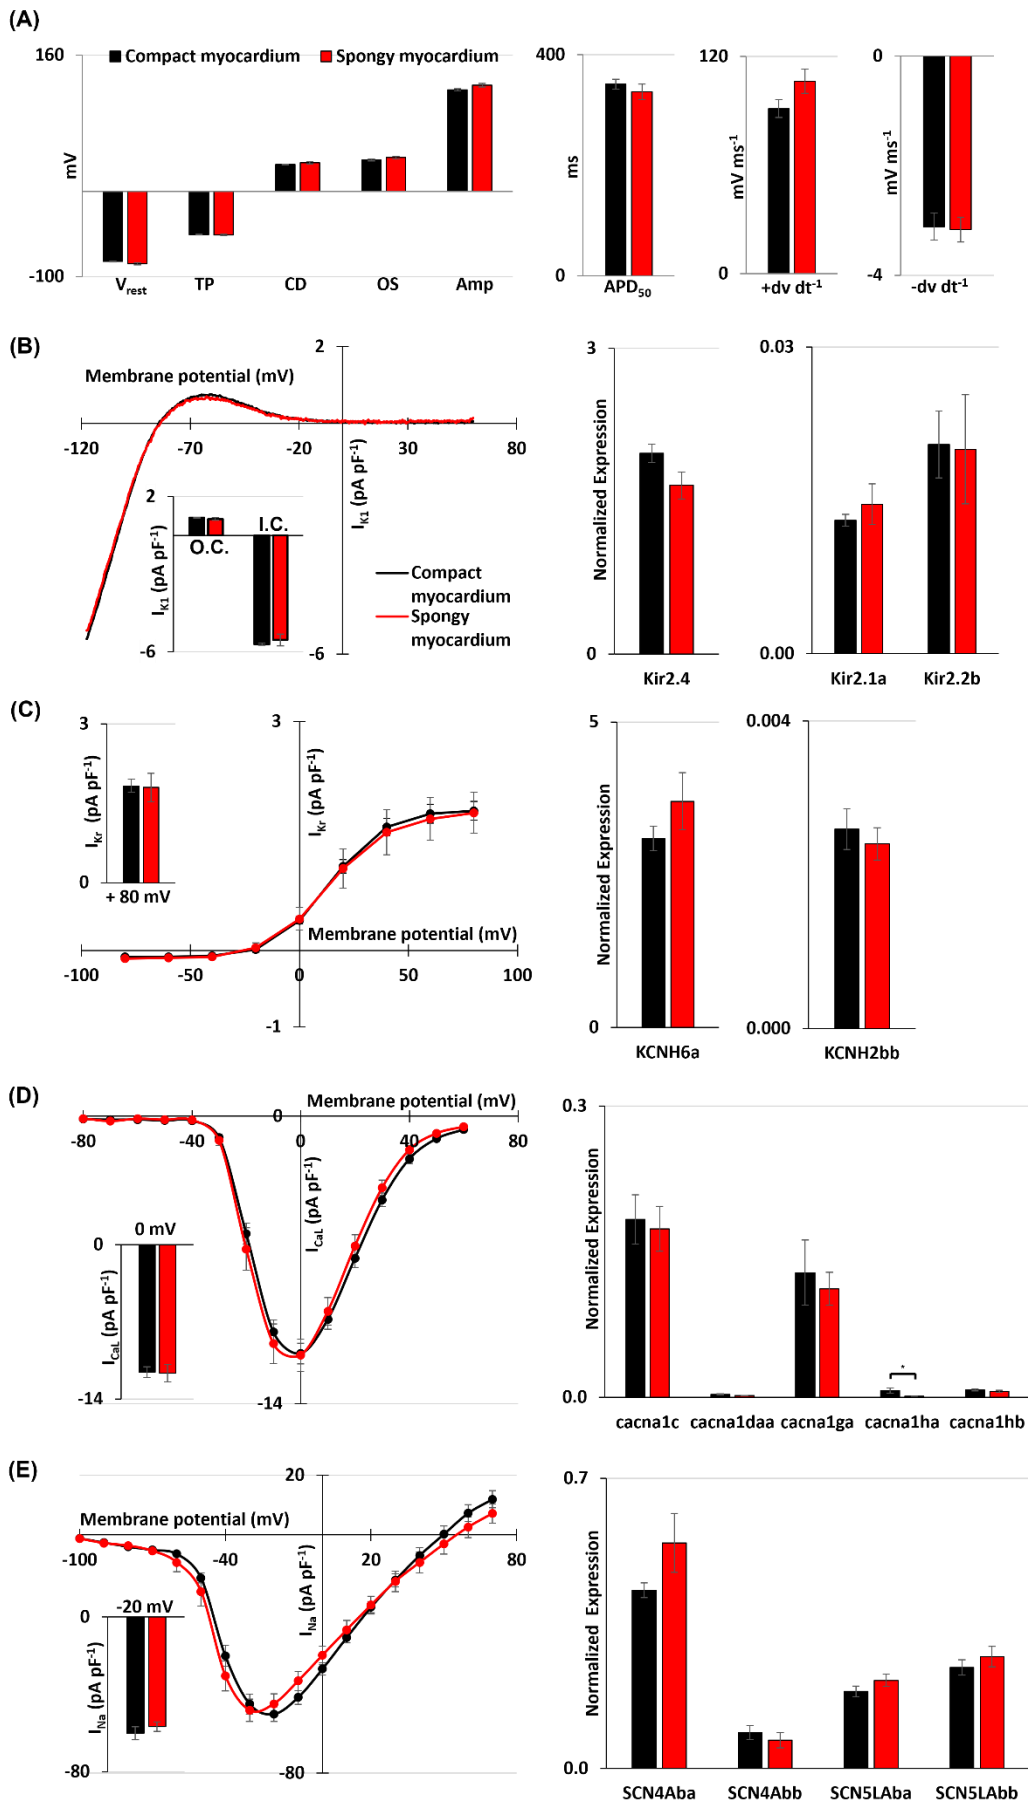

**Fig. S1.** Comparison of action potential (AP) parameters, sarcolemmal ion currents, and ion channel expression between compact (pooled data from apex, middle and basal regions) and spongy myocardium of rainbow trout ventricle. **(A)** Ventricular APs parameters: resting membrane potential ( $V_{rest}$ ), threshold potential for AP initiation (TP), critical depolarization (CD), AP overshoot (OS), AP amplitude (Amp), AP duration at 50% level of repolarization ( $APD_{50}$ ), maximum rate of depolarization ( $+dV dt^{-1}$ ), and repolarization ( $-dV dt^{-1}$ ). **(B-C)** Inward ( $I_{K1}$ ) and delayed rectifier ( $I_{Kr}$ )  $K^+$  currents (left), and transcripts of Kir2 ( $I_{K1}$ ), KCNH2bb and KCNH6a ( $I_{Kr}$ ) channels (right). The insets show peak densities of inward (I.C.) and outward (O.C) of  $I_{K1}$  **(B)**, and peak tail current densities of  $I_{Kr}$  at +80 mV **(C)**. **(D-E)**  $Ca^{2+}$  ( $I_{CaL}$ ) and  $Na^+$  ( $I_{Na}$ ) currents (left), and transcripts of  $Ca^{2+}$  and  $Na^+$  channels (right). The insets show the peak current densities of  $I_{CaL}$  at 0 mV **(D)**, and  $I_{Na}$  at -20 mV **(E)**. An asterisk (\*) indicates statistically significant differences ( $p < 0.05$ ;  $t$ -test) between mean values.

## Dataset 1.

[Click here to download Dataset 1](#)
